# Supplementary material
Source: PubMed Central journal article supplement (PMC9529917)
Supplement: NIHMS1830064-supplement-1.pdf [file NIHMS1830064-supplement-1.pdf]

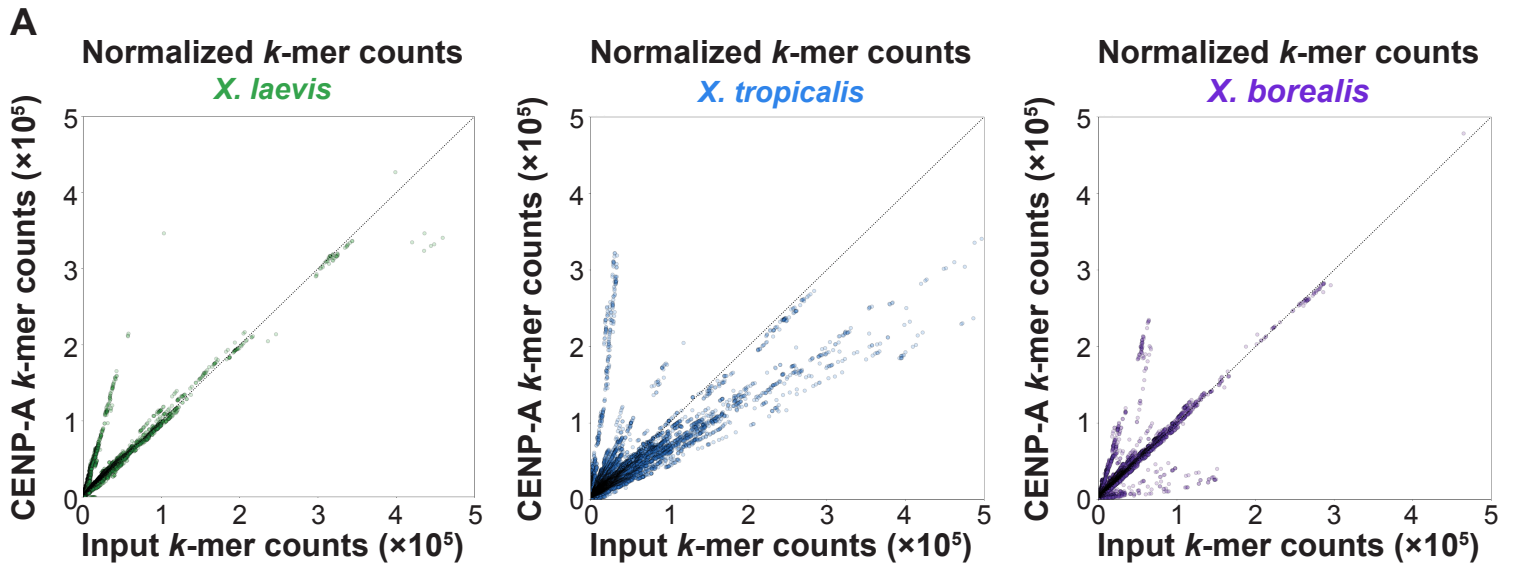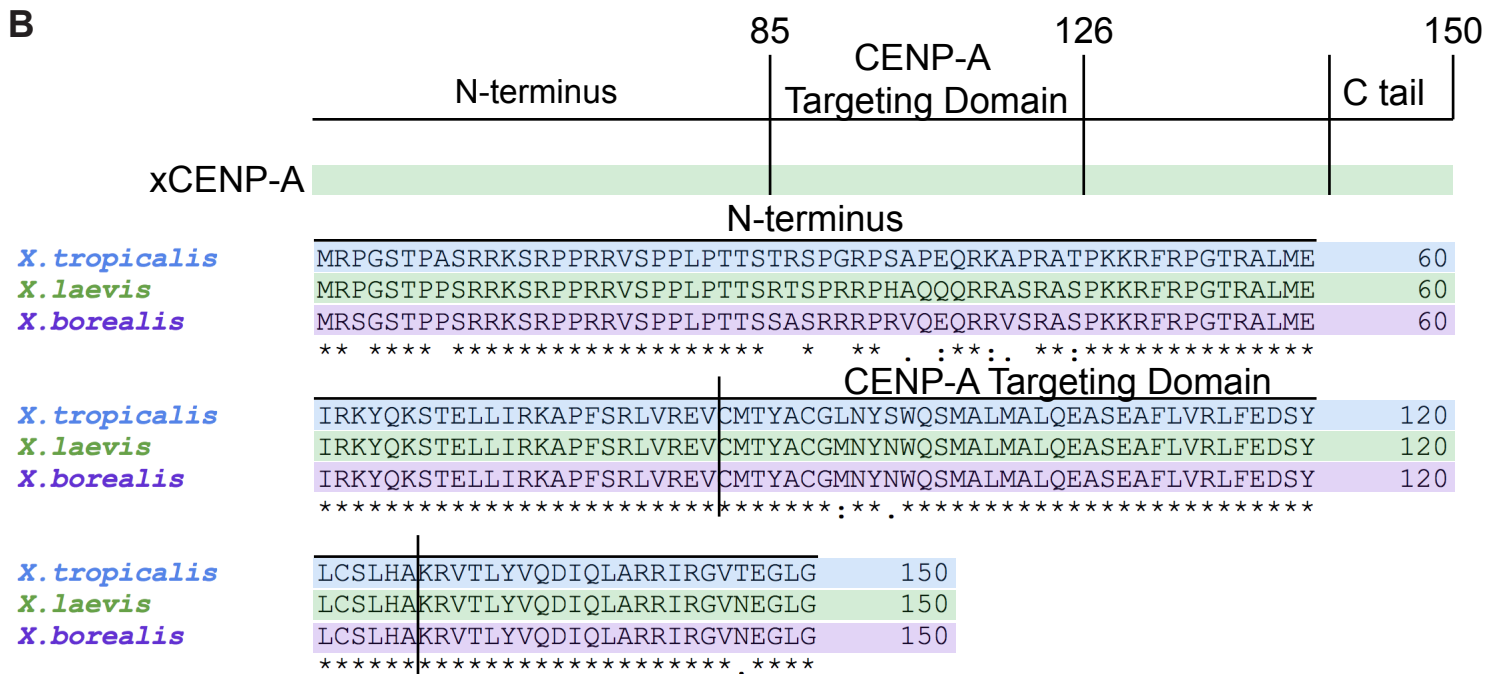

**Figure S1: Comparison of centromere DNA and CENP-A protein sequences,  
Related to Figure 1**

(A) Scatter plots of normalized  $k$ -mer counts from Input and CENP-A ChIP-seq sequencing libraries from *X. laevis*, *X. tropicalis*, and *X. borealis*. The dotted line ( $x=y$ ) indicates  $k$ -mers that are equally abundant in both libraries.  $k$ -mer counts reveal distinct patterns in the three species.

(B) Protein sequence alignment comparing CENP-A across the three *Xenopus* species. Differences are observed in the N-terminal region and the CENP-A targeting domain (CATD).

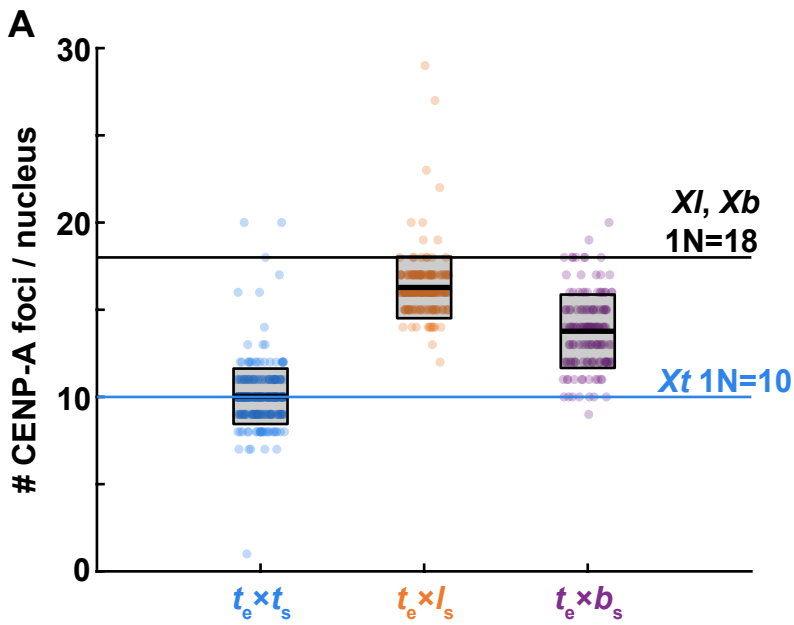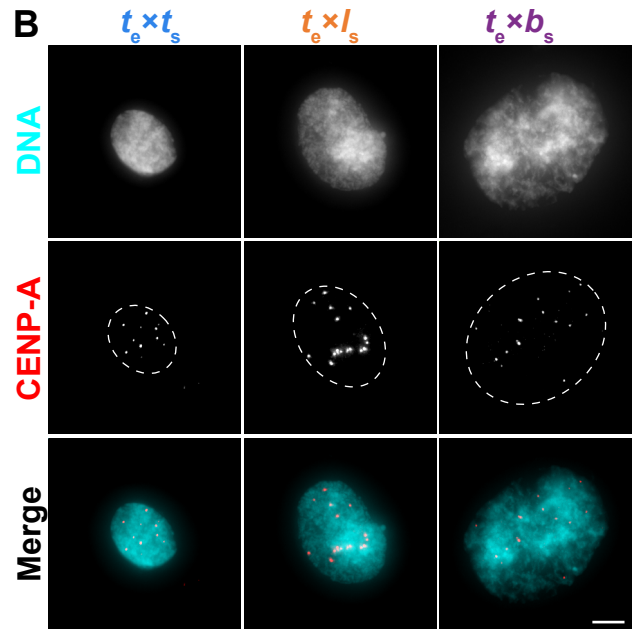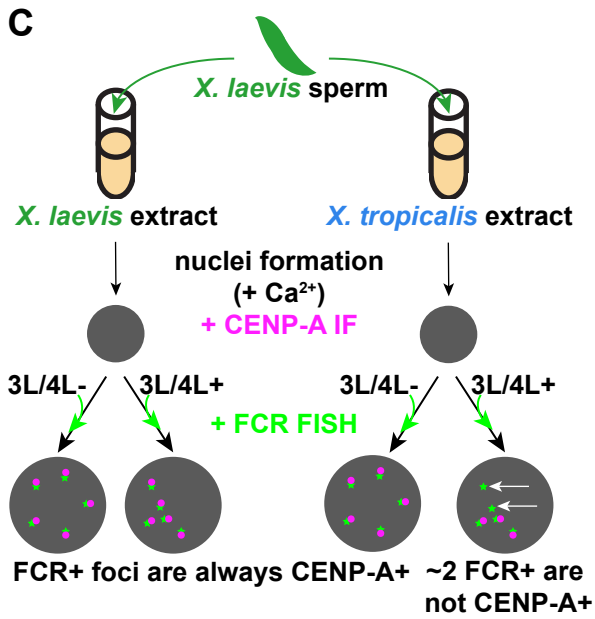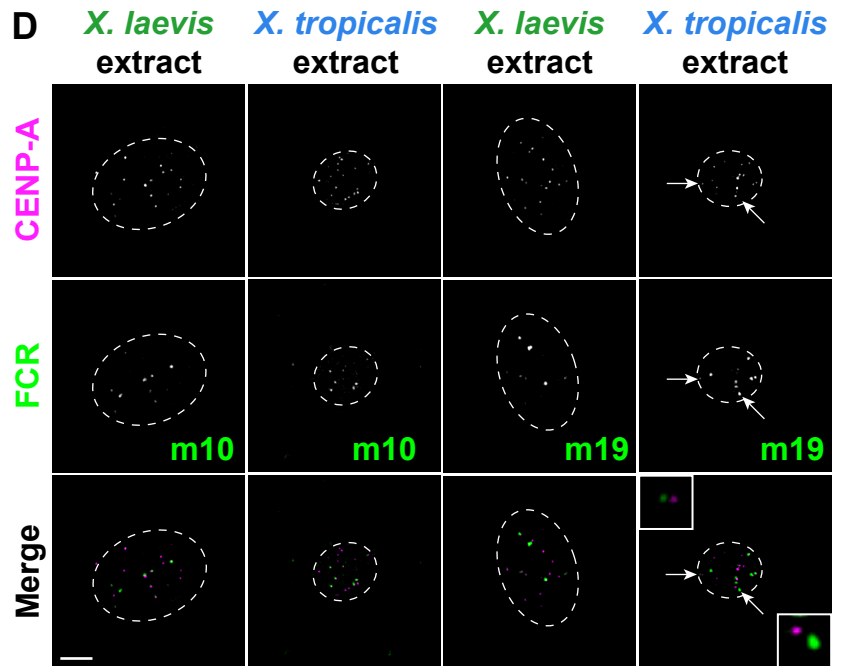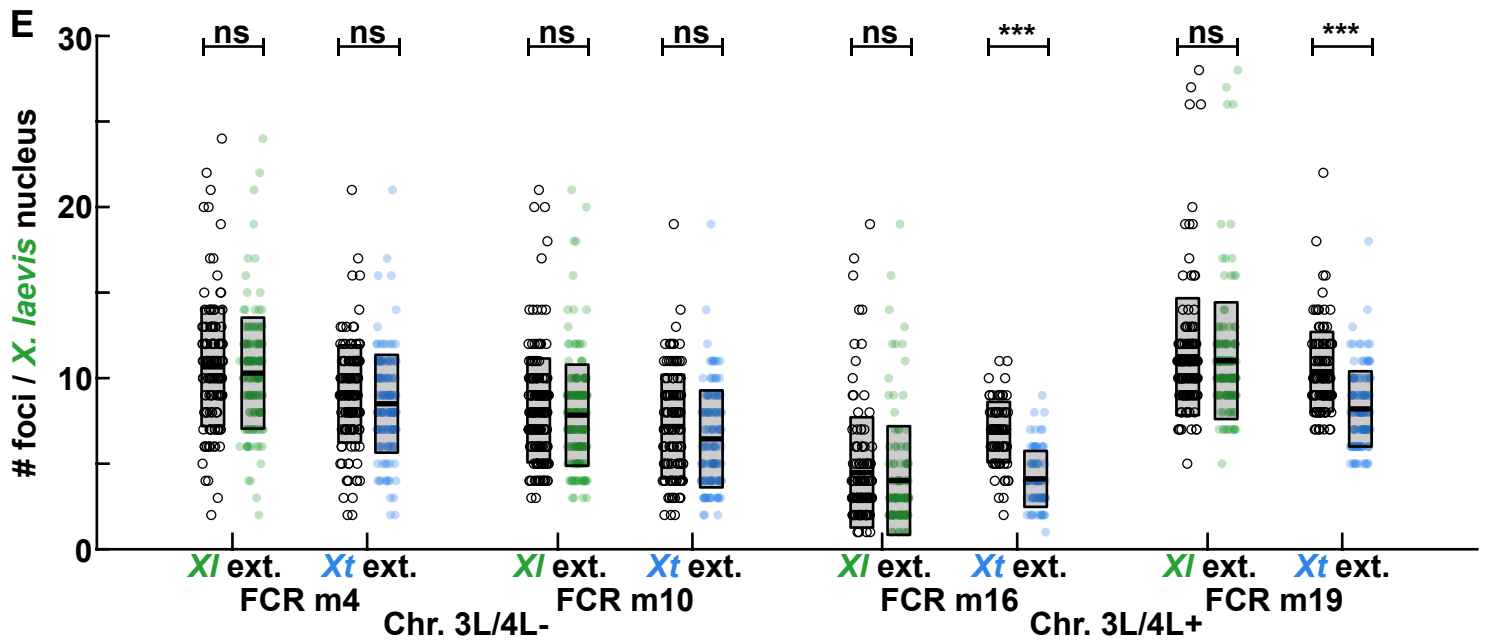

**Figure S2: CENP-A is lost from *X. laevis* chromosomes 3L and 4L, Related to Figure 2**

(A) Quantification of the number of CENP-A foci in interphase nuclei assembled in *X. tropicalis* egg extract. Whereas *X. tropicalis* nuclei on average possess 10 foci corresponding to the 10 sperm chromosomes, *X. laevis* and *X. borealis* interphase nuclei possess an average of 16 and 14 CENP-A foci, respectively, which does not correspond to the 18 sperm chromosomes of these two species. Note that nuclei assembled around sperm chromosomes in egg extract do not always contain a single set of chromosomes, even in control reactions, so averages must be calculated. Quantification with N = 3 extracts, N > 64 nuclei per extract.

(B) Representative images of *X. tropicalis*, *X. laevis* and *X. borealis* nuclei formed in *X. tropicalis* extract. DNA in cyan, CENP-A in red. Scale bar is 5  $\mu$ m.

(C) Experimental schematic for specific centromere quantification. *X. laevis* sperm nuclei were cycled into interphase in either *X. laevis* or *X. tropicalis* egg extract. All centromeres were detected by CENP-A immunofluorescence and a subset of centromeres were identified by FCR (frog centromeric repeat) FISH (Smith et al., 2021). Probes prepared from two sequences not present in centromeres of chromosomes 3L or 4L (3L/4L- = m4, m10), were compared with probes made using two sequences present in centromeres of chromosomes 3L and 4L (3L/4L+ = m16, m19). m16 and m19 recognize ~60% of *X. laevis* chromosomes, and are not specific solely to 3L and 4L. In *X. laevis* extract, all FCR+ foci should co-localize with CENP-A, as 18/18 centromeres are maintained. If centromeric CENP-A staining is lost specifically from chromosomes 3L and 4L in *X. tropicalis* extract, 2 3L/4L+ FCR+ foci should not colocalize with CENP-A (panel A). This experiment was



performed with interphase nuclei to infer chromosome identity, since mitotic chromosomes formed in egg extracts cannot withstand the FISH protocol.

(D) Images of *X. laevis* sperm nuclei formed in *X. laevis* or *X. tropicalis* extract probed by FISH for FCR monomer m10 or m19 (green) and by immunofluorescence of CENP-A (magenta). Insets show the 2 m19 FCR+ foci not co-localized with CENP-A, while all other FCR+ foci co-localize with CENP-A. DNA periphery is marked by the dashed white lines. Scale bar is 5  $\mu$ m.

(E) Quantification of CENP-A foci that co-localize with FCR+ foci in *X. laevis* vs. *X. tropicalis* extract. In *X. laevis* extract, all FCR+ foci co-localize with CENP-A. However, in *X. tropicalis* extract, ~2 m16 or m19 FCR+ foci do not co-localize with CENP-A, corresponding to the loss of CENP-A localization on chromosomes 3L and 4L. Quantification with N = 2 extracts, N > 50 nuclei and > 800 centromeres per probe per extract. p-values by two-tailed two-sample unequal variance t-tests (left to right): 0.3562, 0.0916, 0.3708, 0.0499, 0.2426, 2.797e-19, 0.5485, 7.972e-13; ns, not significant. Open circles are FCR+ foci, filled circles represent foci that are both FCR+ and CENP-A+.

**A**

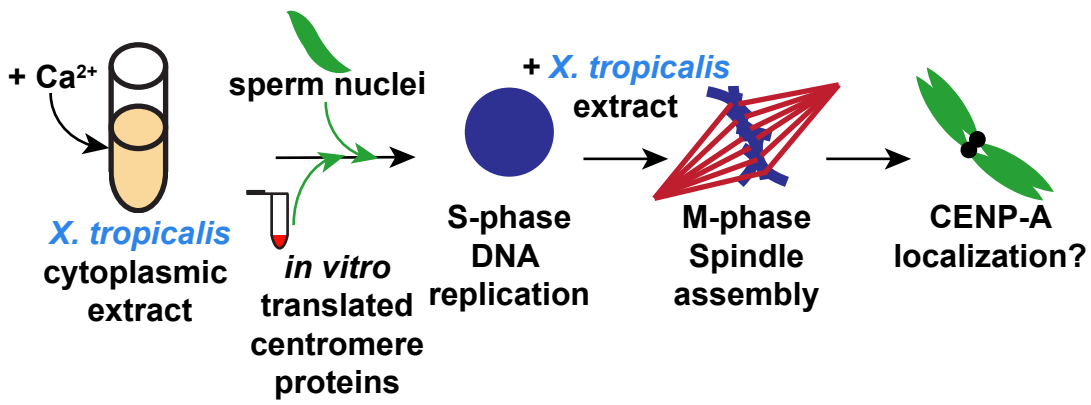

**B**

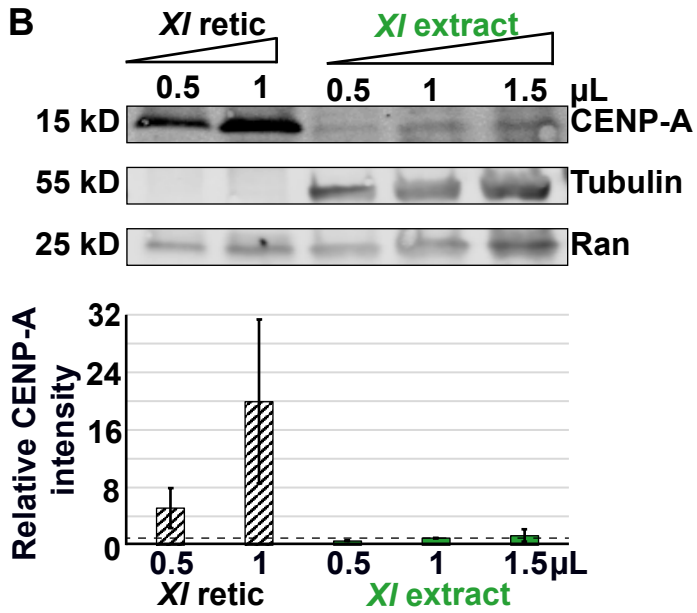

**C**

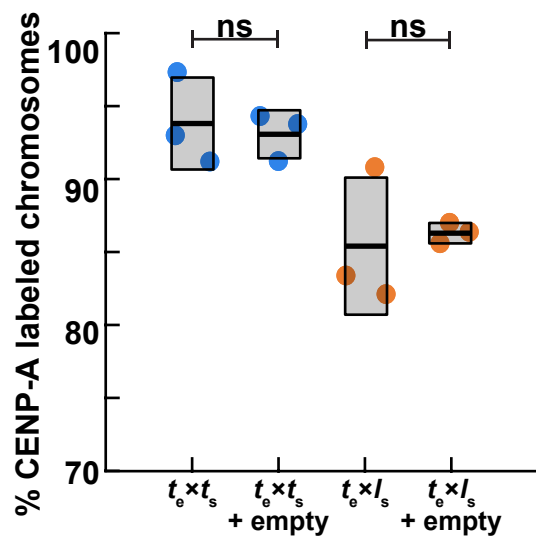

**Figure S3: Driving CENP-A assembly with proteins expressed in reticulocyte lysate, Related to Figure 3**

(A) Experimental schematic of extract reactions in which reticulocyte lysate is added at the onset of interphase to mimic the timing of CENP-A deposition in G1.

(B) Representative Western blot of *X. laevis* CENP-A protein expressed in reticulocyte lysate and quantification of three blots showing band intensity normalized to CENP-A levels in 1  $\mu$ L of *X. laevis* egg extract (dotted line). CENP-A is approximately twenty times more concentrated in reticulocyte lysate compared to *X. laevis* extract, with amounts added to chromosome/nuclear assembly reactions corresponding to 8 or 80 times endogenous CENP-A levels.

(C) Percentage of replicated *X. laevis* or *X. tropicalis* chromosomes with CENP-A staining in *X. tropicalis* extract supplemented with unprogrammed reticulocyte lysate. Lysates containing empty expression vectors have no effect on centromere staining. Quantification from N = 3 extracts, N > 298 chromosomes per extract. p-values (left to right) by two-tailed two-sample unequal variance t-tests: 0.7433, 0.7755; ns, not significant.

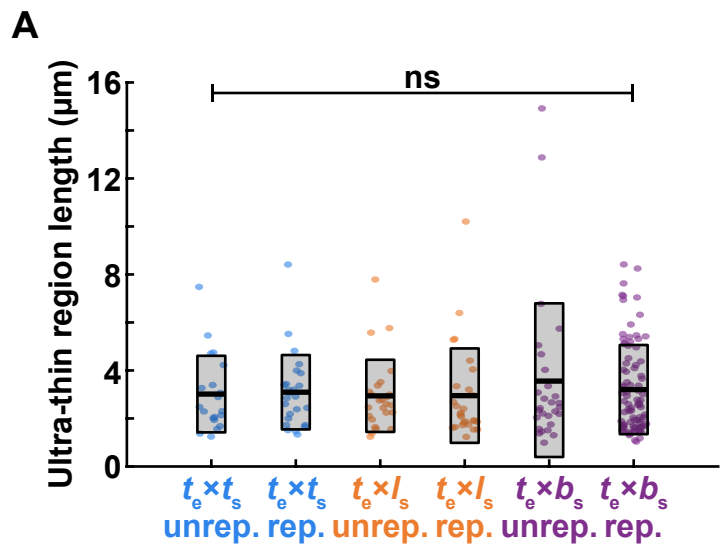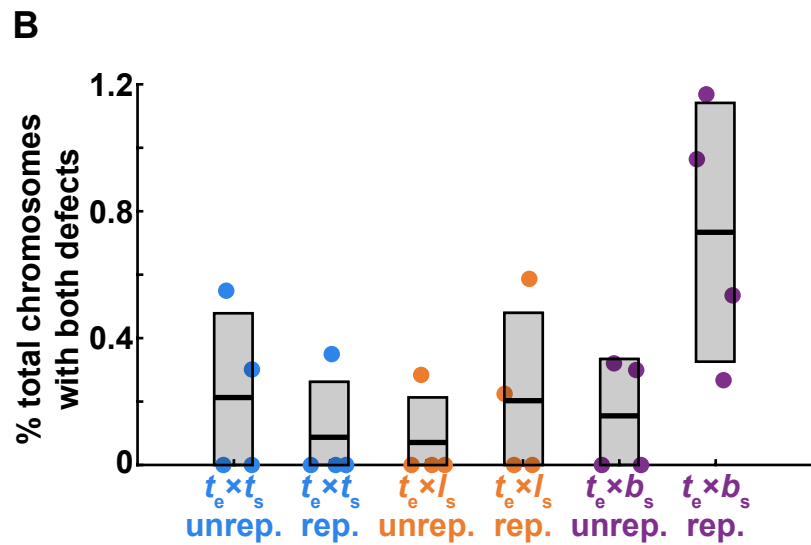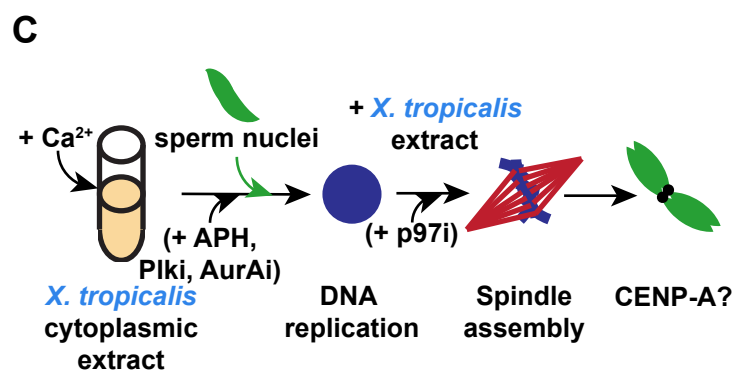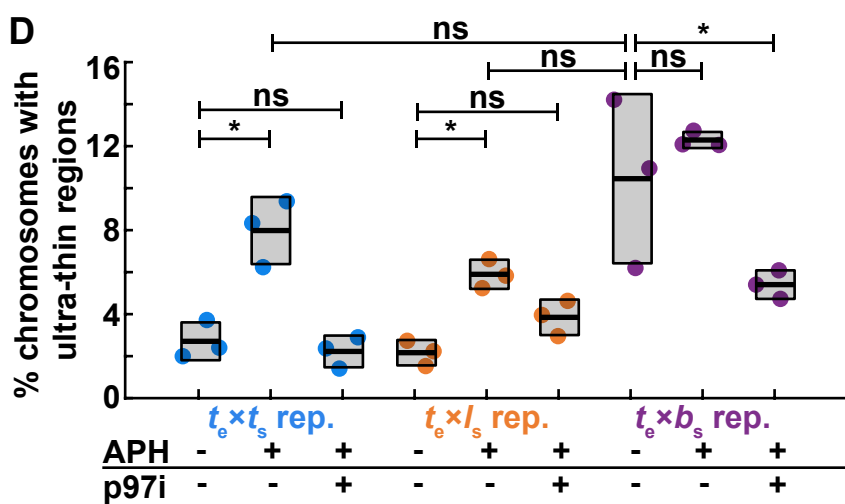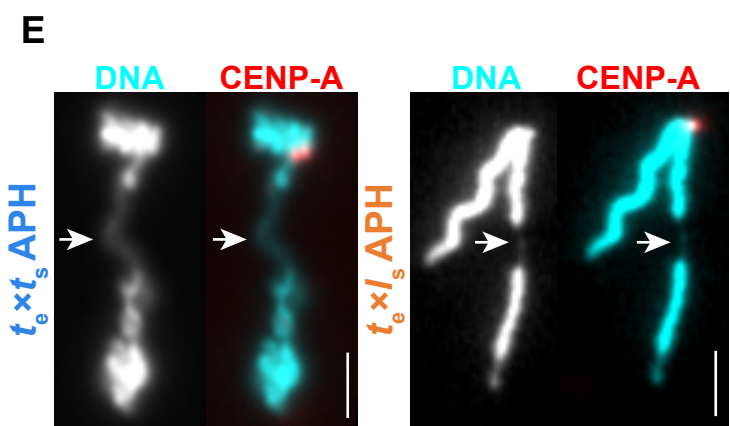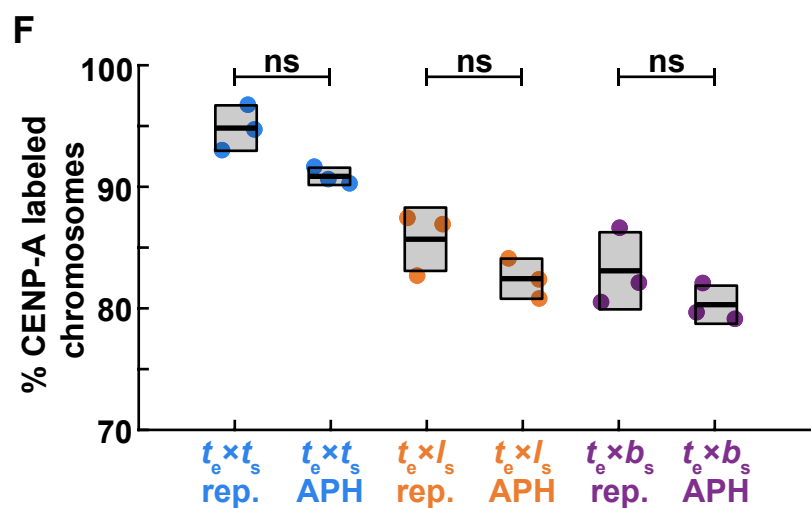

**Figure S4: Characterization of chromosome morphology defects that can be induced by aphidicolin and rescued by p97 inhibition, Related to Figure 4**

(A) Quantification of ultra-thin region lengths, which average  $\sim 2\text{-}3\ \mu\text{m}$  on mitotic chromosomes of all three *Xenopus* species. p-value by one-way ANOVA = 0.8712.

(B) Percentage of *X. tropicalis*, *X. laevis*, and *X. borealis* chromosomes with ultra-thin regions that have also lost CENP-A staining. Only a small fraction of chromosomes with ultra-thin regions also show centromere loss. Across all species, only  $\sim 0.2\text{-}0.6\%$  of all chromosomes exhibit both morphological and centromere defects, corresponding to 1-4 chromosomes out of  $\sim 350$  total chromosomes per extract.

(C) Experimental schematic illustrating when inhibitors are added to *X. tropicalis* extract reactions.

(D) Percentage of mitotic chromosomes with ultrathin regions in *X. tropicalis* extracts treated with solvent control or  $10\ \mu\text{g}/\text{mL}$  aphidicolin (APH) to inhibit DNA replication, and with or without  $10\ \mu\text{M}$  p97 ATPase inhibitor NMS-873 (p97i) to prevent removal of stalled replication forks. Aphidicolin increased the prevalence of ultra-thin chromosome regions on *X. tropicalis* and *X. laevis* chromosomes, but did not significantly exacerbate these regions on *X. borealis* chromosomes. Inhibition of p97 rescued the chromosome morphology defects. Quantification from  $N = 3$  extracts,  $N > 138$  chromosomes per extract. p-values (top to bottom, then left to right) by two-tailed two-sample unequal variance t-tests: 0.6106, 0.0217, 0.9986, 0.8708, 0.9999, 0.9159, 0.0151, 0.0023.

(E) Representative images of *X. tropicalis* and *X. laevis* mitotic chromosomes following aphidicolin treatment. DNA in cyan, CENP-A in red. Scale bar is  $5\ \mu\text{m}$ .

(F) Percentage of replicated chromosomes with centromeric CENP-A staining in *X. tropicalis* extracts treated with solvent control or 10 µg/mL aphidicolin. Inhibition of DNA replication does not affect centromere formation on any species' chromosomes. p-values (left to right) by two-tailed two-sample unequal variance t-tests: 0.0523, 0.1554, 0.2679.

A, B: N = 3 extracts, N > 20 chromosomes per condition.

D, F: N = 3 extracts, N > 150 chromosomes per extract.

A, D, F: ns, not significant.

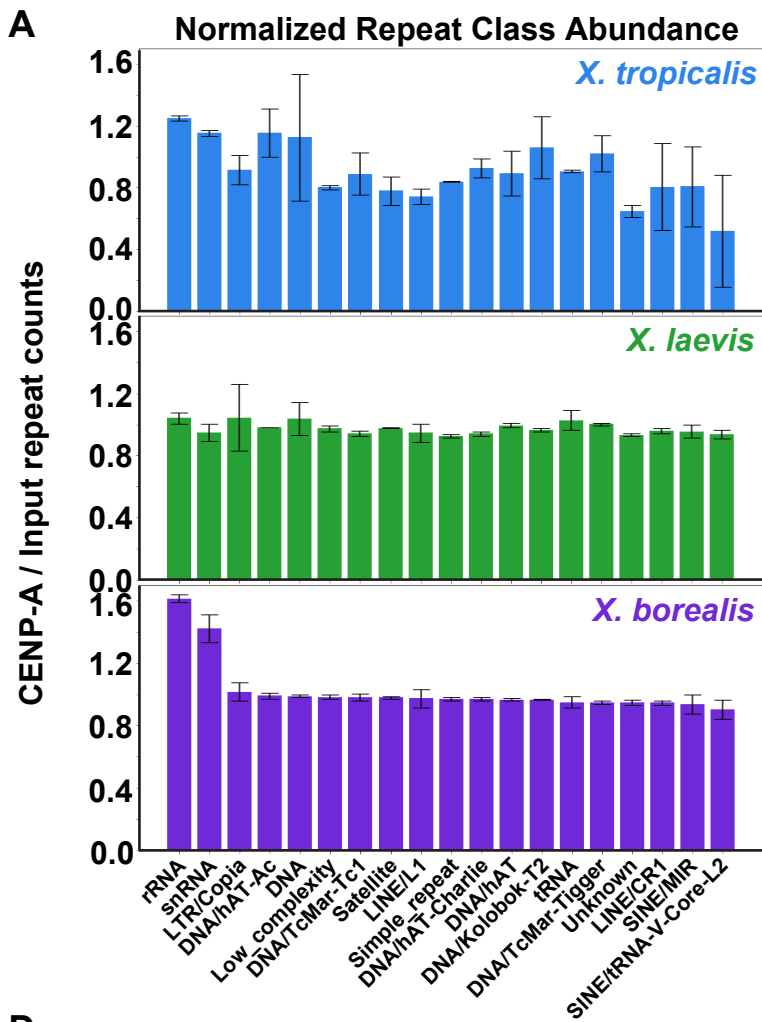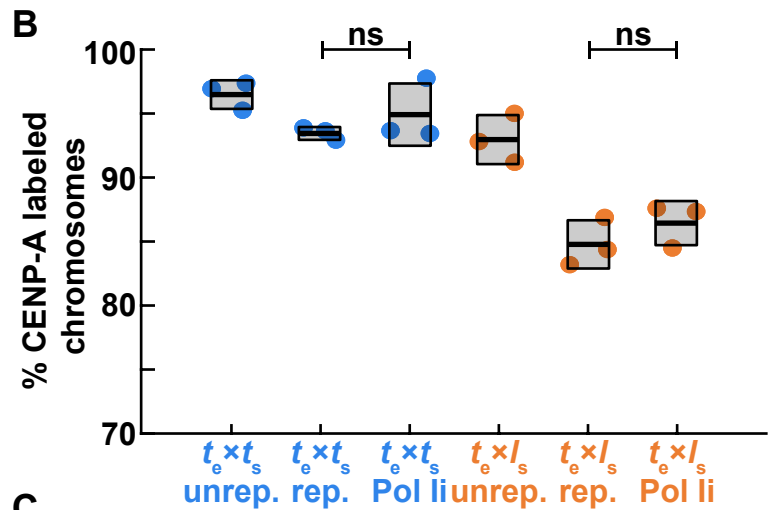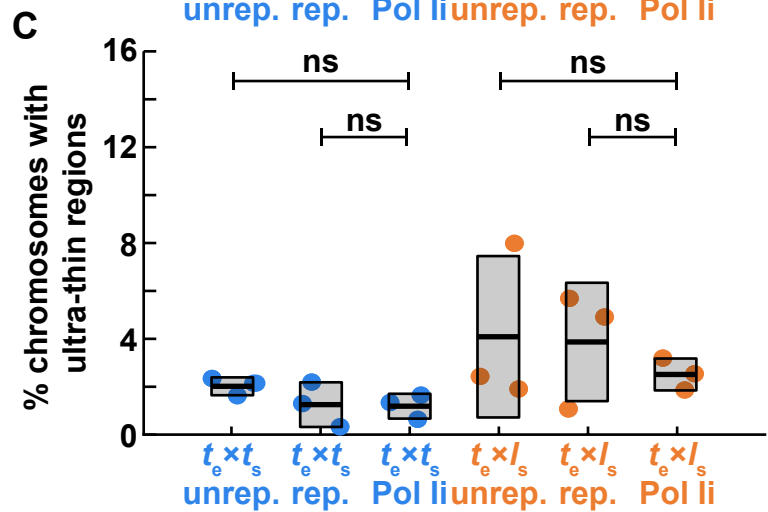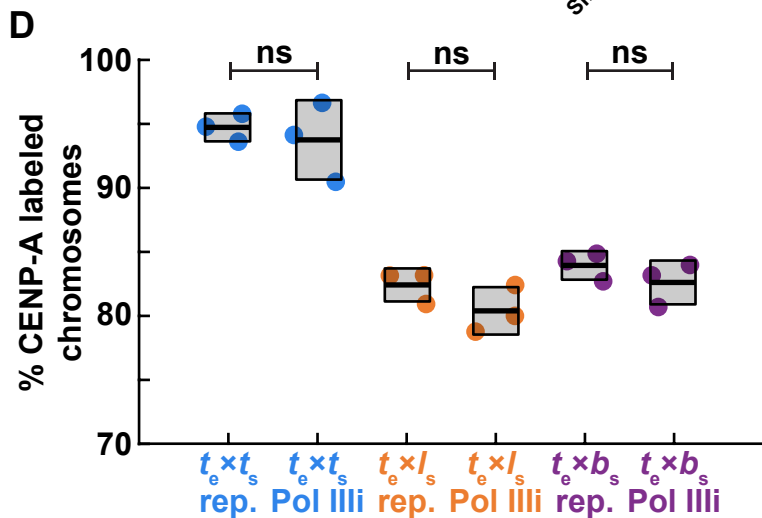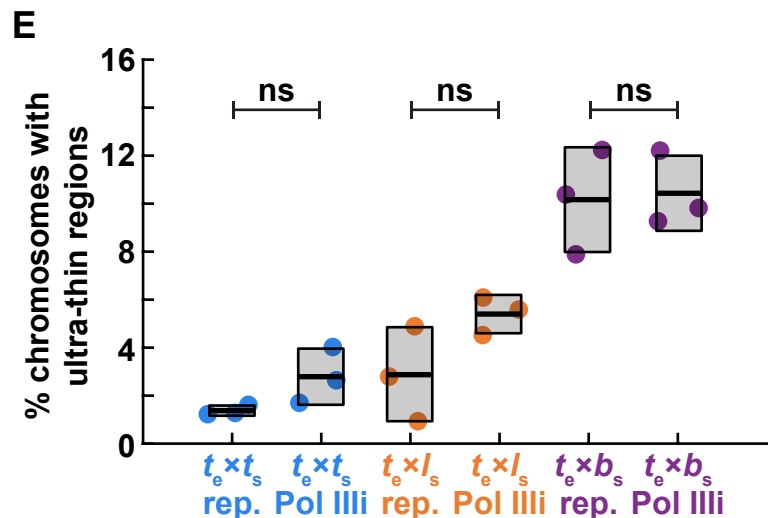

**Figure S5: Pol I transcription inhibition does not affect *X. tropicalis* or *X. laevis* chromosomes, while Pol III inhibition had no effect on any species, Related to Figure 5**

(A) Bar plots showing the makeup of repeat classes in the core centromere (CENP-A-associated) sequences normalized to the input sequences of each species. Mean and standard deviation of CENP-A/Input counts from 3 one million read subsets are shown. Only repeat classes found more than 25 times per one million reads in the CENP-A dataset are plotted.

(B, C) The percentage of *X. tropicalis* or *X. laevis* mitotic chromosomes formed in *X. tropicalis* egg extract with centromeric CENP-A staining (B) or ultrathin regions (C) is unchanged upon treatment with 1  $\mu$ M BMH-21 to inhibit RNA Pol I (Pol Ii). Quantification with N = 3 extracts, N > 113 chromosomes per extract. p-values by one-way ANOVA with Tukey post-hoc analysis: (B, left to right) 0.9702, 0.9413, (C, left to right, then top to bottom) 0.9995, 0.9711, 1, 0.9882.

(D, E) The percentage of *X. tropicalis*, *X. laevis*, or *X. borealis* mitotic chromosomes formed in *X. tropicalis* egg extract with centromeric CENP-A staining (D) or ultrathin regions (E) is unchanged upon treatment with 20  $\mu$ M ML-69218 to inhibit RNA Pol III (Pol Ili). Quantification with N = 3 extracts, N > 179 chromosomes per extract. p-values by one-way ANOVA with Tukey post-hoc analysis: (D, left to right) 0.9389, 0.7506, 0.9416, (E, left to right) 0.8431, 0.3540, 0.9999.

B-E: ns, not significant.



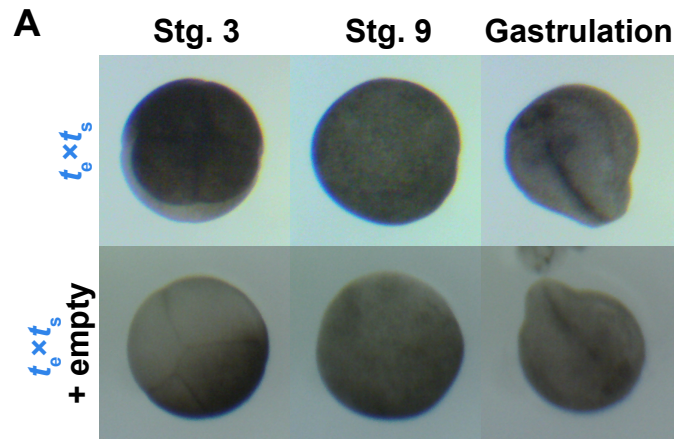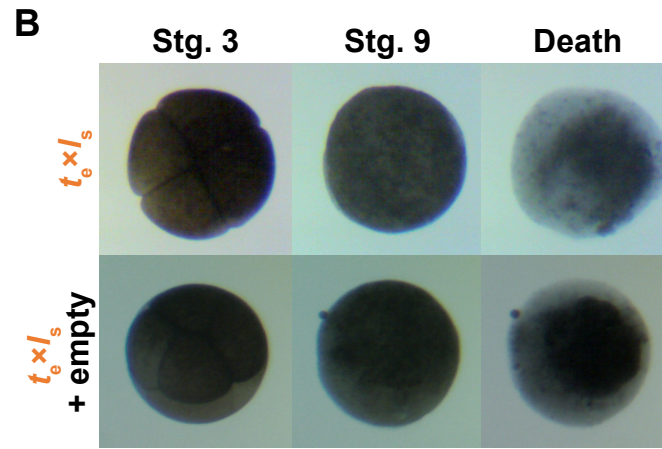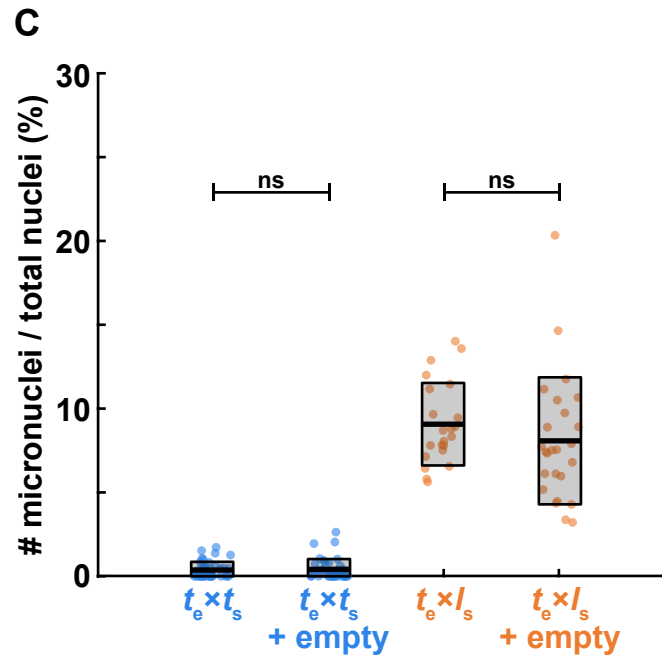

**Figure S6: Microinjection with reticulocyte lysate does not affect embryo development or chromosome segregation, Related to Figure 6**

(A) Video frames of untreated *X. tropicalis* embryos and embryos microinjected at the two-cell stage with empty reticulocyte lysate into both blastomeres show that embryonic development is not affected by the procedure. N = 15 embryos across 3 clutches. Scale is 200  $\mu\text{m}$ .

(B) Video frames of untreated *X. tropicalis/X. laevis* hybrid embryos and hybrid embryos microinjected at the two-cell stage with empty reticulocyte lysate into both blastomeres show that the embryonic death phenotype is not affected by the procedure. N = 12 embryos across 2 clutches. Scale is 200  $\mu\text{m}$ .

(C) Quantification of the number of micronuclei compared to total nuclei in stage 9 *X. tropicalis* embryos or *X. tropicalis/X. laevis* hybrid embryos microinjected with empty reticulocyte lysate. The prevalence of micronuclei is unaffected by the procedure. p-values (left to right) by two-tailed two-sample unequal variance t-tests: 0.749, 0.288; ns, not significant.
